# Supplementary material for: The Dietary Intervention of Transgenic Low-Gliadin Wheat Bread in Patients with Non-Celiac Gluten Sensitivity (NCGS) Showed No Differences with Gluten Free Diet (GFD) but Provides Better Gut Microbiota Profile
Source: MDPI journal article supplement (doi:10.3390/nu10121964), 2018-12-12
Supplement: s1 [file s1]

(a)

UNWEIGHTED\_UNIFRAC\_DISTANCES\_PCOA\_PLOT

$P=0.165$

PC 2 (7.42%)

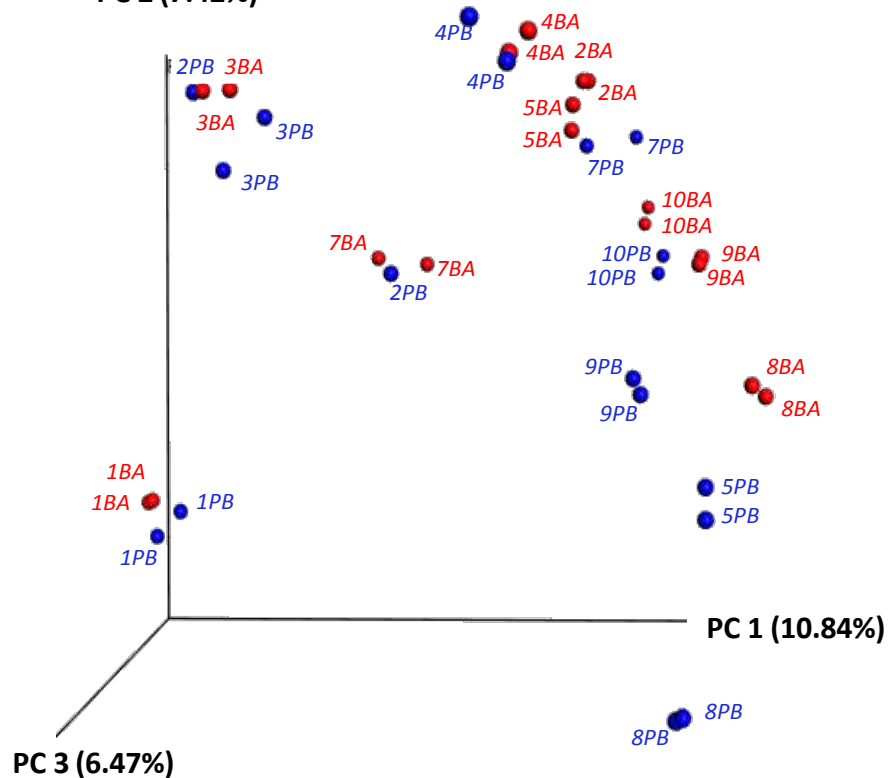

(b)

WEIGHTED\_UNIFRAC\_DISTANCES\_PCOA\_PLOT

$P=0.059$

PC 2 (18.25%)

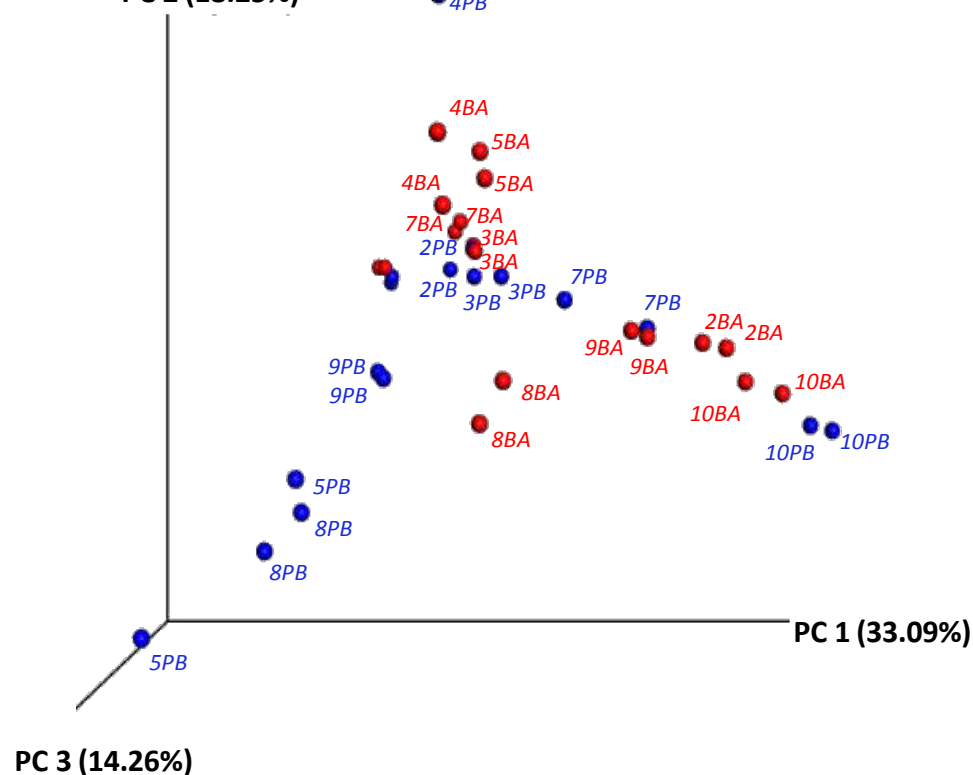

**Figure S3.** Beta-diversity estimators. Graph represented show Principal Coordinate Analysis (PCoA) between basal phase and E82 phase that were estimated using a PERMANOVA test at a depth of 10696 sequences per sample for each beta diversity estimators: (a) unweighted UniFrac distances; (b) weighted UniFrac distances.
