# Supplementary material for: The Dietary Intervention of Transgenic Low-Gliadin Wheat Bread in Patients with Non-Celiac Gluten Sensitivity (NCGS) Showed No Differences with Gluten Free Diet (GFD) but Provides Better Gut Microbiota Profile
Source: MDPI journal article supplement (doi:10.3390/nu10121964), 2018-12-12
Supplement: s1 [file s1]

(a)

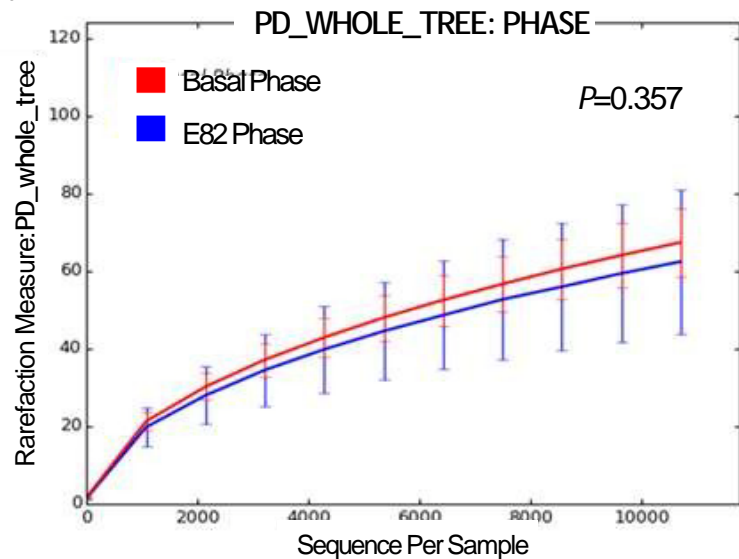

(b)

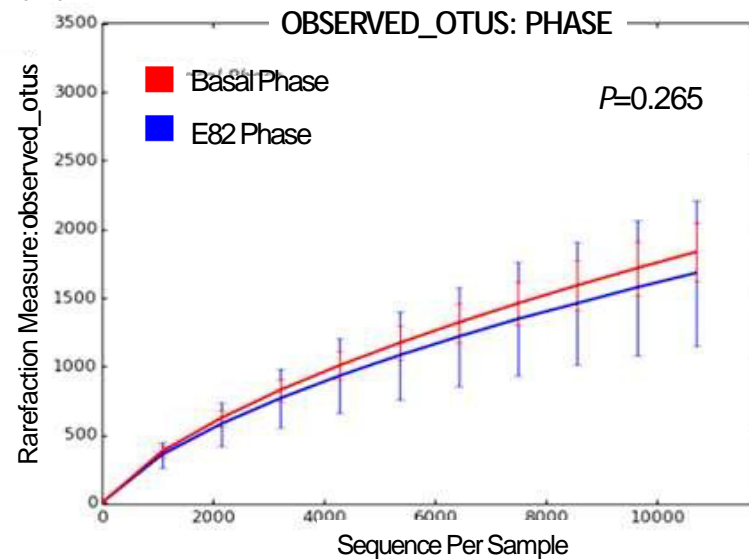

(c)

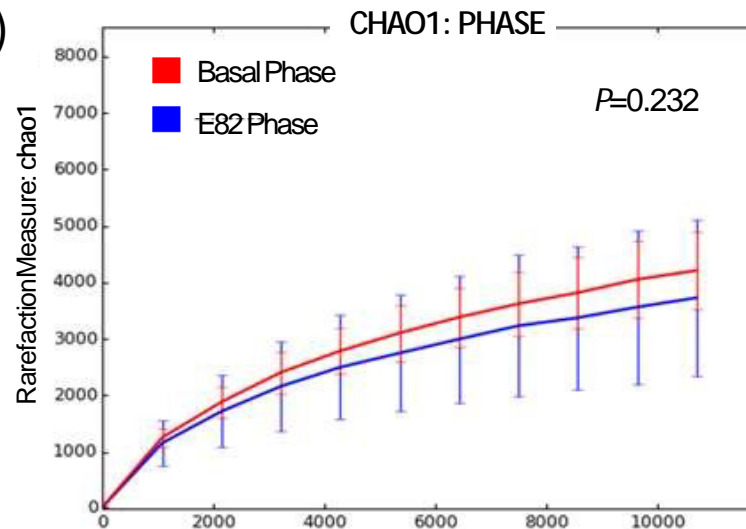

**Figure S2. Alpha diversity estimators.** Graphs represented show the rarefaction curves between basal phase and E82 phase that were estimated using a non-parametric test and Monte Carlo permutations at a depth of 10696 sequences per sample for each of the three alpha diversity estimators : (a) PDwhole tree; (b) chao1; (c) observed otus.
