# Supplementary material for: The Dietary Intervention of Transgenic Low-Gliadin Wheat Bread in Patients with Non-Celiac Gluten Sensitivity (NCGS) Showed No Differences with Gluten Free Diet (GFD) but Provides Better Gut Microbiota Profile
Source: MDPI journal article supplement (doi:10.3390/nu10121964), 2018-12-12
Supplement: s1 [file s1]

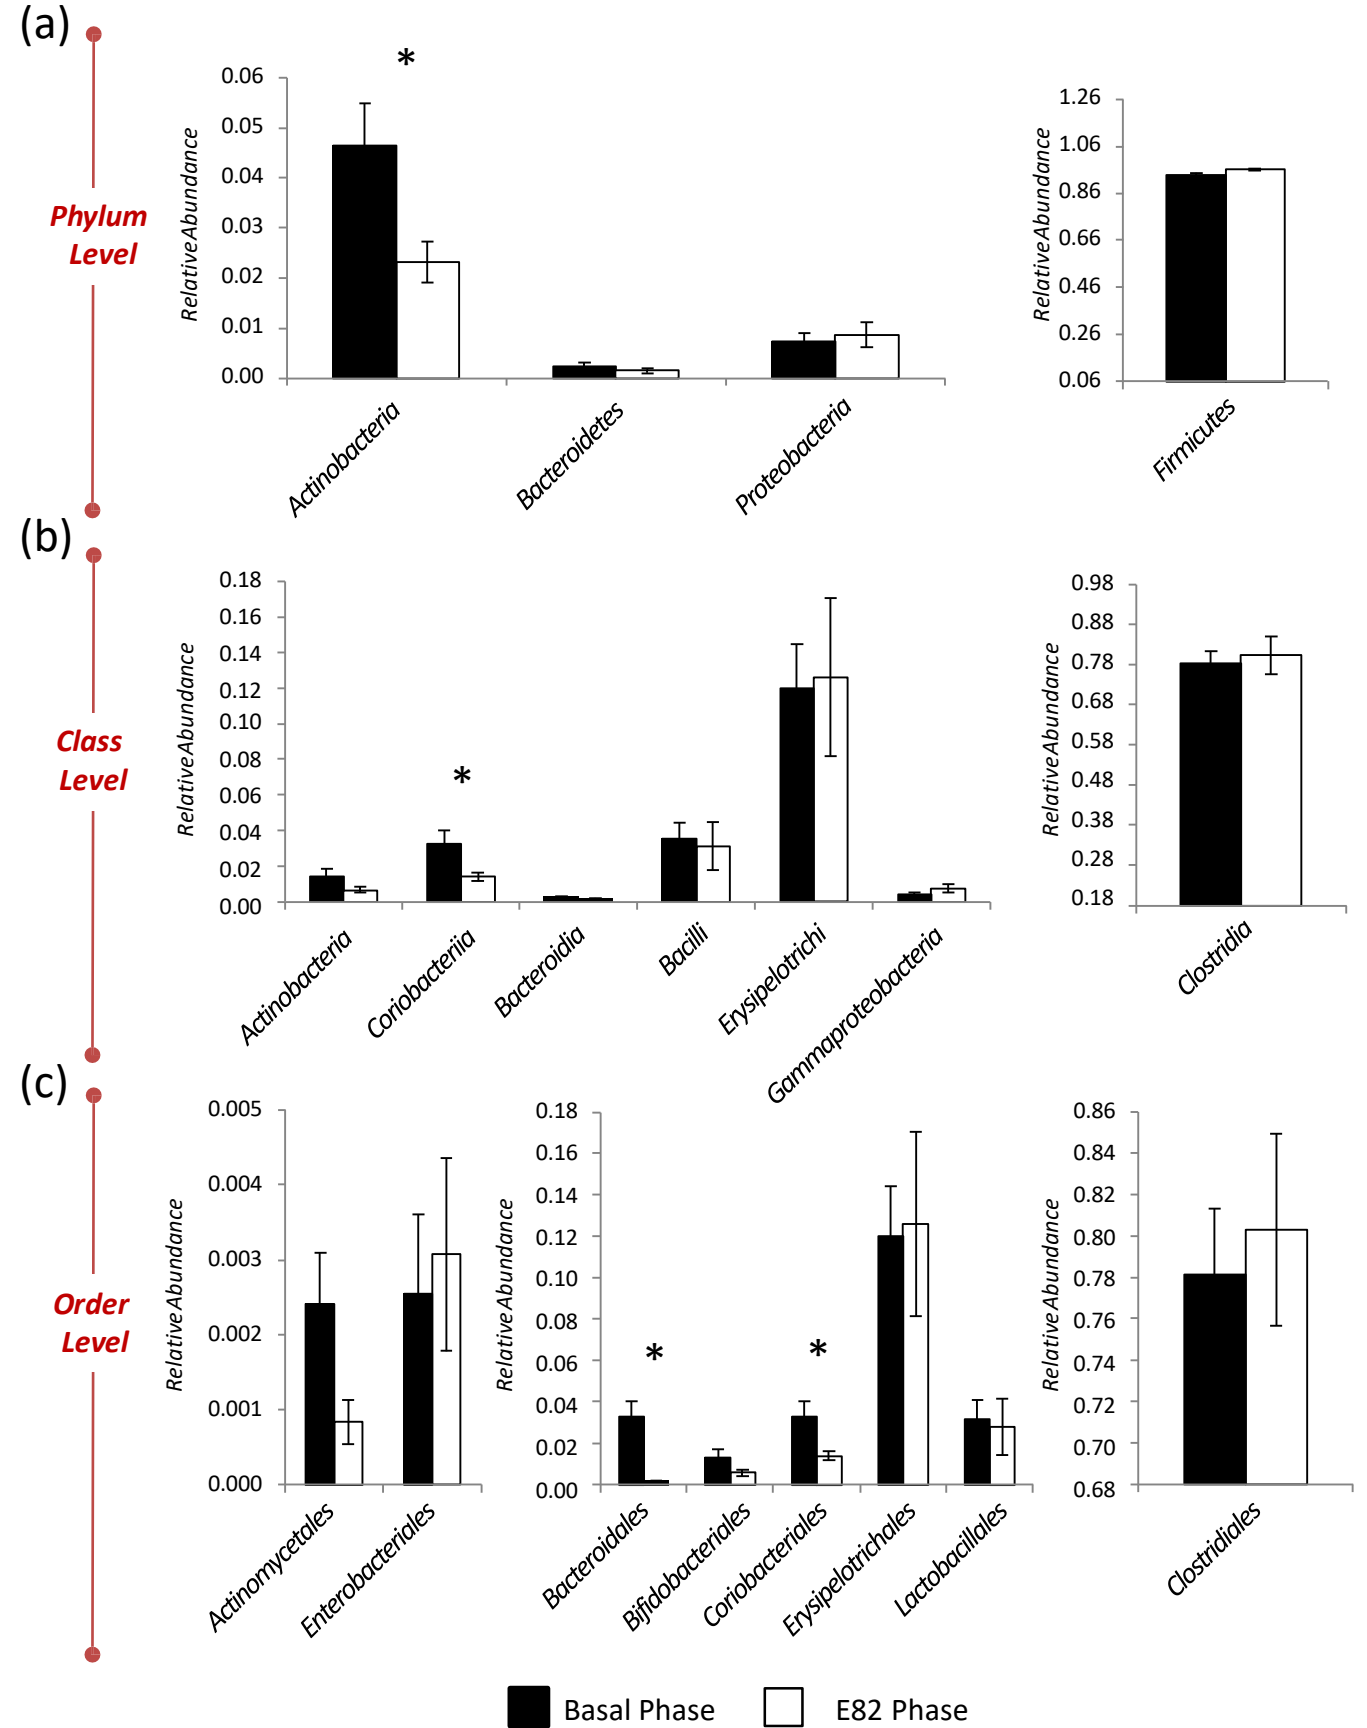

**Figure S4.** Differences in the gut microbiota composition between basal phase and E82 phase at phylum, class and order level. Values are the mean  $\pm$  S.E.M. The statistically significant differences between each phase were tested by non-parametric Kruskal-Wallis test. \*  $P < 0.05$ . (a) Phylum level; (b) Class level; (c) Order level.
