# Supplementary figures and images for: The Dietary Intervention of Transgenic Low-Gliadin Wheat Bread in Patients with Non-Celiac Gluten Sensitivity (NCGS) Showed No Differences with Gluten Free Diet (GFD) but Provides Better Gut Microbiota Profile
Source: MDPI journal article supplement (doi:10.3390/nu10121964), 2018-12-12

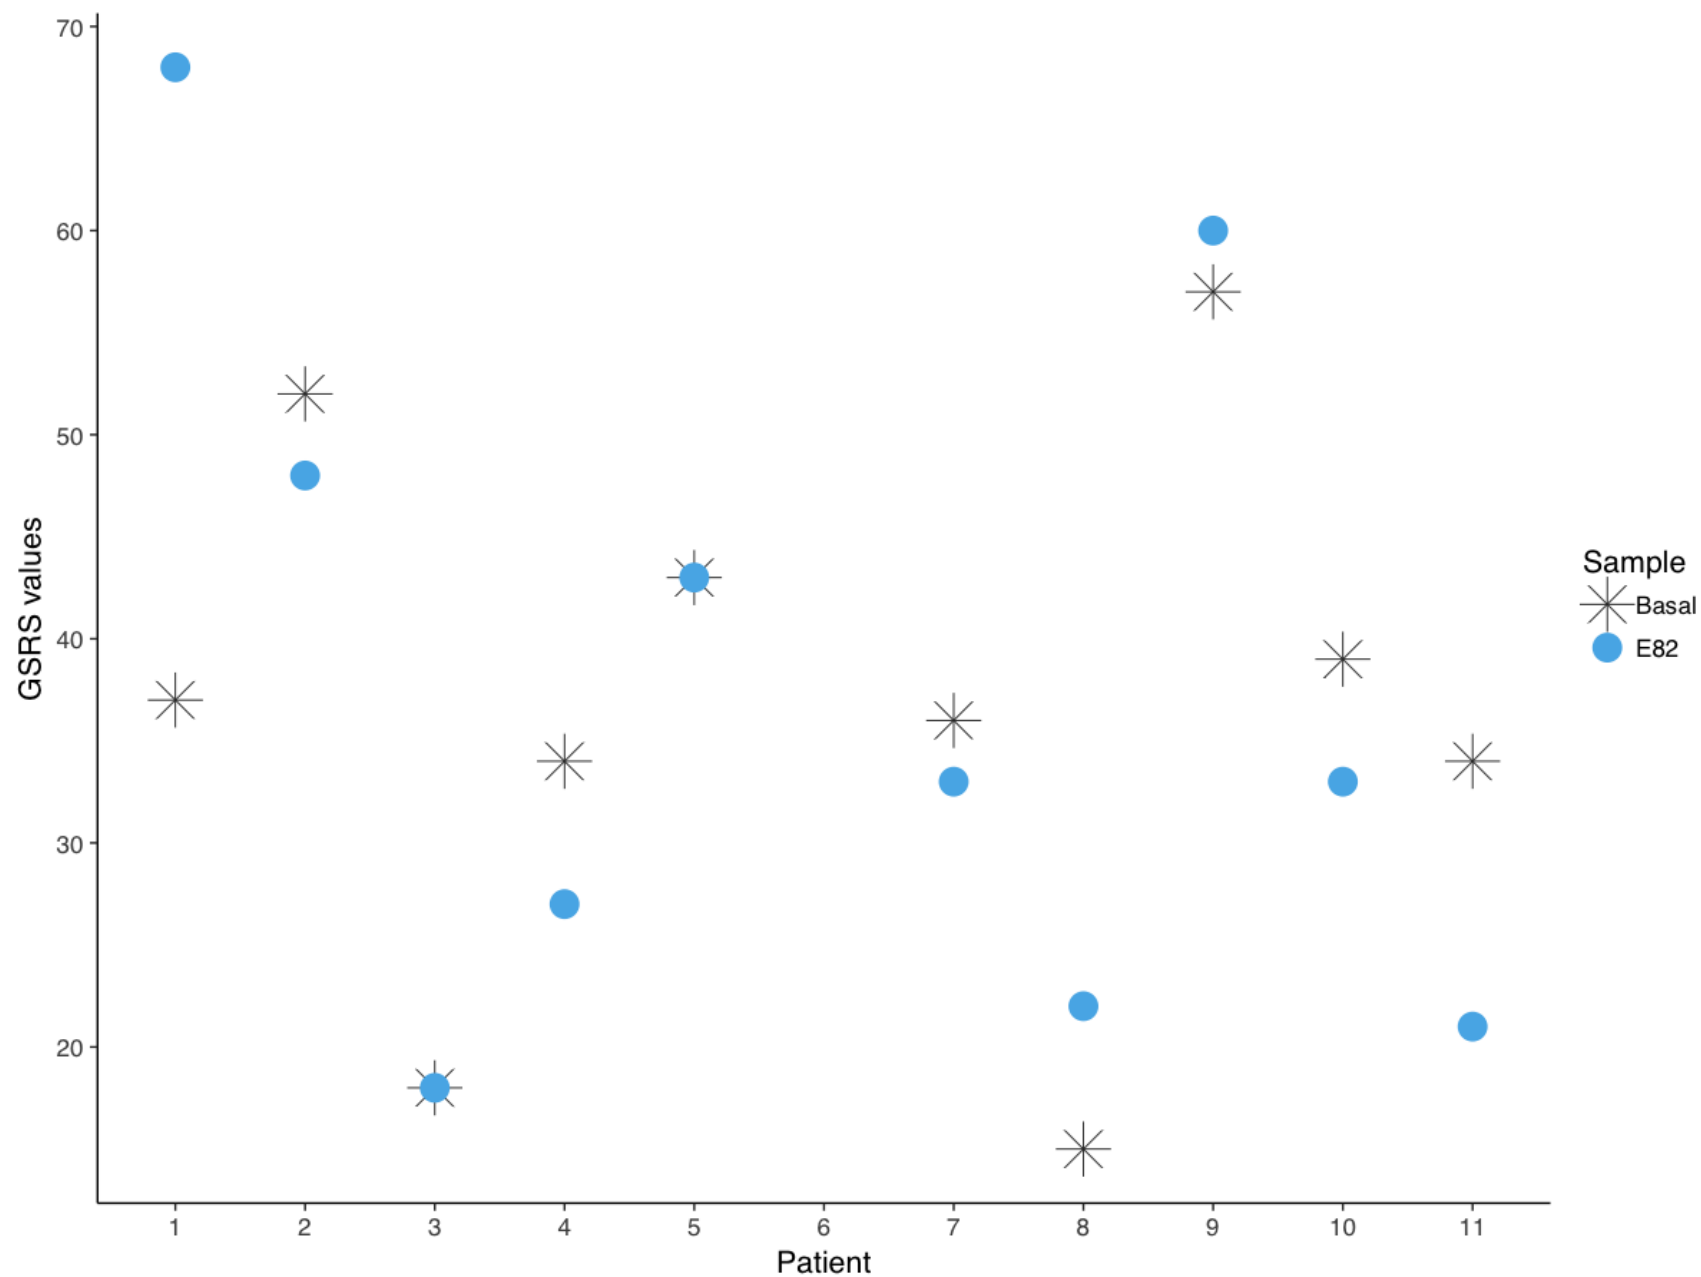

**Figure S1.** GSRs values per patient for the two different breads.

Supplement: s1 [file s1]
